# Supplementary material
Source: MDPI journal article supplement (https://www.mdpi.com/2311-5629/10/1/10)
Supplement: s1 [file s1]

Archive with 3 entries (3 files):
- Modelling parameters.xlsx
- Supporting Information-dataset.xlsx
- Supporting Information.pdf
