# Supplementary material
Source: MDPI journal article supplement (https://www.mdpi.com/2311-5629/10/1/10)
Supplement: s1 [file s1 › Modelling parameters.xlsx]

## Sheet: Sheet1
	Yield-char	SSA-char
RandomForest	max_depth=8, max_features='sqrt', min_samples_leaf=5, min_samples_split=50, n_estimators=9, random_state=10	criterion=friedman_mse, max_depth=80, max_features=sqrt, min_samples_leaf=1, min_samples_split=7
GBDT	learning_rate=0.2, max_depth=8, max_features='sqrt', min_samples_leaf=5, min_samples_split=50, n_estimators=1150, random_state=10, subsample=0.8	alpha = 0.9, learning_rate=0.1, max_depth=3, min_sample_leaf=1, min_samples_split=2, n_estimators=400, random_sate=100
Adaboost	learning_rate=1.0, n_estimators=50, max_depth=5, max_samples_leaf=1, max_samples_split=2, loss=linear, random_state=50	learning_rate=0.8, n_estimators=200, max_depth=5, max_samples_leaf=1, max_samples_split=2, loss=linear, random_state=100
LightGBM	learning=0.1, max_depth=5, min_child_sample=20, min_child_weight=0.001, num_leaves=31, reg_alpha=0.2, reg_lambda=0.01	learning=0.1, max_depth=5, min_child_sample=20, min_child_weight=0.006, num_leaves=25, reg_alpha=0.0, reg_lambda=0.0, n_esitimators=100
XGBoost	learning_rate=0.1, n_esitmitors=340, max_depth=8, min_child_weight=2, subsample=0.8, colsample_bytree=0.8, gamma=0.5, reg_alpha=0.05, reg_lambda=1	learning_rate=0.2, n_estimators=909, max_depth=6, min_child_weight=1, gamma=0.5, colsample_tree=0.75, reg_alpha=0.1, reg_lambda=0.8
