# Supplementary material
Source: MDPI journal article supplement (https://www.mdpi.com/2311-5629/10/1/10)
Supplement: s1 [file s1 › Supporting Information-dataset.xlsx]

## Sheet: Dataset
NO.	Ref.	DOI	Biomass type	C (%)	H (%)	N (%)	O (%)	VM (%)	Ash (%)	FC (%)	T (°C)	RT (min)	HR (°C/min)	Yield-char (%)	SSA-char (m2/g)
[1]	Influence of carbonization temperature on physicochemical properties of biochar derived from slow pyrolysis of durian wood (Durio zibethinus) sawdust	https://doi.org/10.15376/biores.11.2.3356-3372	Durian Wood	33.77	11.4	6.06	48.77	85.8044	10.5189	3.67671	350	180	10		2.567
			Durian Wood	33.77	11.4	6.06	48.77	85.8044	10.5189	3.67671	450	180	10		45.68
			Durian Wood	33.77	11.4	6.06	48.77	85.8044	10.5189	3.67671	550	180	10		221
[2]	Characteristics of biochar derived from marine macroalgae and fabrication of granular biochar by entrapment in calcium-alginate beads for phosphate removal from aqueous solution	https://doi.org/10.1016/j.biortech.2016.03.066	marine macroalgae	39.7849	6.35386	5.40427	48.4569		24.51		200	120	5	78.34	1.909
			marine macroalgae	39.7849	6.35386	5.40427	48.4569		24.51		400	120	5	63.64	70.29
			marine macroalgae	39.7849	6.35386	5.40427	48.4569		24.51		600	120	5	37.96	61.809
			marine macroalgae	39.7849	6.35386	5.40427	48.4569		24.51		800	120	5	27.05	44.491
			marine macroalgae	46.9672	6.98925	2.96388	43.0797		16.54		200	60	7	66.46	2.39
			marine macroalgae	46.9672	6.98925	2.96388	43.0797		16.54		400	60	7		17.72
			marine macroalgae	46.9672	6.98925	2.96388	43.0797		16.54		600	60	7		79.95
			marine macroalgae	46.9672	6.98925	2.96388	43.0797		16.54		800	60	7	24.56	45.46
[3]	Sorption properties optimization of agricultural wastes-derived biochars using response surface methodology	https://doi.org/10.1016/j.psep.2017.05.002	empty fruit bunch (EFB)	53.0413	6.3909	0.871969	39.3662	82.0701	4.8841	13.0458	500	60	3		1.4112
			empty fruit bunch (EFB)	53.0413	6.3909	0.871969	39.3662	82.0701	4.8841	13.0458	300	120	3		1.4234
			empty fruit bunch (EFB)	53.0413	6.3909	0.871969	39.3662	82.0701	4.8841	13.0458	700	120	3		1.1323
			empty fruit bunch (EFB)	53.0413	6.3909	0.871969	39.3662	82.0701	4.8841	13.0458	500	180	3		0.8594
			empty fruit bunch (EFB)	53.0413	6.3909	0.871969	39.3662	82.0701	4.8841	13.0458	300	60	6.5		1.0765
			empty fruit bunch (EFB)	53.0413	6.3909	0.871969	39.3662	82.0701	4.8841	13.0458	700	60	6.5		0.9194
			empty fruit bunch (EFB)	53.0413	6.3909	0.871969	39.3662	82.0701	4.8841	13.0458	500	120	6.5		2.9422
			empty fruit bunch (EFB)	53.0413	6.3909	0.871969	39.3662	82.0701	4.8841	13.0458	300	180	6.5		0.5298
			empty fruit bunch (EFB)	53.0413	6.3909	0.871969	39.3662	82.0701	4.8841	13.0458	700	180	6.5		0.9906
			empty fruit bunch (EFB)	53.0413	6.3909	0.871969	39.3662	82.0701	4.8841	13.0458	500	60	10		1.9962
			empty fruit bunch (EFB)	53.0413	6.3909	0.871969	39.3662	82.0701	4.8841	13.0458	300	120	10		1.4286
			empty fruit bunch (EFB)	53.0413	6.3909	0.871969	39.3662	82.0701	4.8841	13.0458	700	120	10		1.693
			empty fruit bunch (EFB)	53.0413	6.3909	0.871969	39.3662	82.0701	4.8841	13.0458	500	180	10		1.0885
			rice husk (RH)	52.8467	6.18658	0.436866	40.2198	70.7836	12	17.2164	500	60	3		7.8437
			rice husk (RH)	52.8467	6.18658	0.436866	40.2198	70.7836	12	17.2164	300	120	3		0.3948
			rice husk (RH)	52.8467	6.18658	0.436866	40.2198	70.7836	12	17.2164	700	120	3		206.709
			rice husk (RH)	52.8467	6.18658	0.436866	40.2198	70.7836	12	17.2164	500	180	3		67.9483
			rice husk (RH)	52.8467	6.18658	0.436866	40.2198	70.7836	12	17.2164	300	60	6.5		0.0187
			rice husk (RH)	52.8467	6.18658	0.436866	40.2198	70.7836	12	17.2164	700	60	6.5		210.034
			rice husk (RH)	52.8467	6.18658	0.436866	40.2198	70.7836	12	17.2164	500	120	6.5		57.545
			rice husk (RH)	52.8467	6.18658	0.436866	40.2198	70.7836	12	17.2164	300	180	6.5		1.3712
			rice husk (RH)	52.8467	6.18658	0.436866	40.2198	70.7836	12	17.2164	700	180	6.5		208.802
			rice husk (RH)	52.8467	6.18658	0.436866	40.2198	70.7836	12	17.2164	500	60	10		7.0609
			rice husk (RH)	52.8467	6.18658	0.436866	40.2198	70.7836	12	17.2164	300	120	10		1.9522
			rice husk (RH)	52.8467	6.18658	0.436866	40.2198	70.7836	12	17.2164	700	120	10		190.961
			rice husk (RH)	52.8467	6.18658	0.436866	40.2198	70.7836	12	17.2164	500	180	10		38.8253
[4]	Characteristics of biochar pellets from corn straw under different pyrolysis temperatures	https://doi.org/10.1098/rsos.172346	corn straw pellets	40.02	6.01	0.88	52.86	72.2947	10.0208	17.6845	400	30	10	50.17	4.26
			corn straw pellets	40.02	6.01	0.88	52.86	72.2947	10.0208	17.6845	450	30	10	49.57	12.61
			corn straw pellets	40.02	6.01	0.88	52.86	72.2947	10.0208	17.6845	500	30	10	48.46	24.38
			corn straw pellets	40.02	6.01	0.88	52.86	72.2947	10.0208	17.6845	550	30	10	47.05	29.6
			corn straw pellets	40.02	6.01	0.88	52.86	72.2947	10.0208	17.6845	600	30	10	45.52
[5]	Effect of water washing pretreatment on property and adsorption capacity of macroalgae-derived biochar	https://doi.org/10.1016/j.jenvman.2018.12.031	Saccharina japonica algae	40.1776	5.54939	1.99778	51.3873				300	60	10		1.36
			Saccharina japonica algae	40.1776	5.54939	1.99778	51.3873				450	60	10		210
			Saccharina japonica algae	40.1776	5.54939	1.99778	51.3873				600	60	10		266
[6]	Co-pyrolysis of sewage sludge and rice husk/ bamboo sawdust for biochar with high aromaticity and low metal mobility	https://doi.org/10.1016/j.envres.2020.110034	rice husk (RH)	40.6493	5.95424	1.06625	52.1864		16.53		400	60	10	60.57	5.49
			rice husk (RH)	40.6493	5.95424	1.06625	52.1864		16.53		700	60	10	52.58	7.12
			sewage sludge (SS)	45.7399	10.7623	7.03691	34.9086	49.3578	42.02	8.62697	400	60	10	53.84	4.39
			sewage sludge (SS)	45.7399	10.7623	7.03691	34.9086	49.3578	42.02	8.62697	700	60	10	40.35	10.71
			bamboo sawdust (BS)	49.51	3.41976	0.765619	46.0188		2.04		400	60	10	44.51	2.78
			bamboo sawdust (BS)	49.51	3.41976	0.765619	46.0188		2.04		700	60	10	37.54	7.57
[7]	Distribution and evolution of organic matter phases during biochar formation and their importance in carbon loss and pore structure	https://doi.org/10.1016/j.cej.2014.04.053	Wheat straw	41.4804	5.75581	0.564863	52.1989		2.255		200	240	18	28.174
			Wheat straw	41.4804	5.75581	0.564863	52.1989		2.255		350	240	18	28.174	3.48
			Wheat straw	41.4804	5.75581	0.564863	52.1989		2.255		500	240	18	28.174	33.2
			Wheat straw	41.4804	5.75581	0.564863	52.1989		2.255		650	240	18	28.174	182
			Pig manure	54.717	7.79874	2.51572	34.9686		9.899		200	240	18	38.628
			Pig manure	54.717	7.79874	2.51572	34.9686		9.899		350	240	18	38.628
			Pig manure	54.717	7.79874	2.51572	34.9686		9.899		500	240	18	38.628	47.4
			Pig manure	54.717	7.79874	2.51572	34.9686		9.899		650	240	18	38.628	42.4
[8]	Properties of biomass-derived biochars: Combined effects of operating conditions and biomass types	https://doi.org/10.1016/j.biortech.2015.05.054	Raw maize straw	42.1873	7.20784	1.27962	49.1852		5.31		250	60	26		5.2
			Raw maize straw	42.1873	7.20784	1.27962	49.1852		5.31		300	60	26	36.7	7.8
			Raw maize straw	42.1873	7.20784	1.27962	49.1852		5.31		500	60	26	28.9	33.2
			Raw maize straw	42.1873	7.20784	1.27962	49.1852		5.31		500	480	26	27.5	39.6
			Raw maize straw	42.1873	7.20784	1.27962	49.1852		5.31		600	480	26	24.1	42.7
			Raw maize straw	42.1873	7.20784	1.27962	49.1852		5.31		700	480	26	12.7	41.5
			Raw sugarcane bagasse	48.8804	7.10716	1.01959	42.8828		4.98		250	60	26		8.7
			Raw sugarcane bagasse	48.8804	7.10716	1.01959	42.8828		4.98		300	60	26	38.1	25.3
			Raw sugarcane bagasse	48.8804	7.10716	1.01959	42.8828		4.98		500	60	26	23.7	97.8
			Raw sugarcane bagasse	48.8804	7.10716	1.01959	42.8828		4.98		500	480	26	20.3	105.4
			Raw sugarcane bagasse	48.8804	7.10716	1.01959	42.8828		4.98		600	480	26	18.8	108.7
			Raw sugarcane bagasse	48.8804	7.10716	1.01959	42.8828		4.98		700	480	26	9.6	110.2
			Raw pine sawdust	50.6051	6.18062	0.050005	43.1043		3.76		250	60	26		7.4
			Raw pine sawdust	50.6051	6.18062	0.050005	43.1043		3.76		300	60	26	40.9	12.1
			Raw pine sawdust	50.6051	6.18062	0.050005	43.1043		3.76		500	60	26	25.8	68.4
			Raw pine sawdust	50.6051	6.18062	0.050005	43.1043		3.76		500	480	26	24.3	79.3
			Raw pine sawdust	50.6051	6.18062	0.050005	43.1043		3.76		600	480	26	19.5	83.6
			Raw pine sawdust	50.6051	6.18062	0.050005	43.1043		3.76		700	480	26	10.2	81.6
[9]	Pyrolysis kinetics of sewage sludge and its biochar characteristics	https://doi.org/10.1016/j.psep.2017.10.014	sewage sludge	43.9678	13.6729	7.23861	32.8418	55.8	33.7	10.5	300	10	10		14.0024
			sewage sludge	43.9678	13.6729	7.23861	32.8418	55.8	33.7	10.5	500	10	10		55.7198
			sewage sludge	43.9678	13.6729	7.23861	32.8418	55.8	33.7	10.5	600	10	10		92.4544
			sewage sludge	43.9678	13.6729	7.23861	32.8418	55.8	33.7	10.5	700	10	10		65.5673
[10]	Preparation and characterization of activated carbon from waste biomass	https://doi.org/10.1016/j.jhazmat.2008.10.011	soybean oil cake	44.48	6.28	8.21	40.49	77.4978	6.47202	16.0302	600	60	5	29.72	9.47
			soybean oil cake	44.48	6.28	8.21	40.49	77.4978	6.47202	16.0302	800	60	5	27.77	5.37
[11]	Nitrogen retention of biochar derived from different feedstocks at variable pyrolysis temperatures	https://doi.org/10.1016/j.jaap.2018.04.010	Switchgrass	44.6951	7.23699	1.195	46.8729	94.1612	2.47277	3.36601	200	60	10	70.0148	4.375
			Switchgrass	44.6951	7.23699	1.195	46.8729	94.1612	2.47277	3.36601	400	60	10	31.7714	25.8333
			Switchgrass	44.6951	7.23699	1.195	46.8729	94.1612	2.47277	3.36601	600	60	10	23.2991	47.5
			Switchgrass	44.6951	7.23699	1.195	46.8729	94.1612	2.47277	3.36601	800	60	10	21.335	62.5
			Water Oak	53.6539	7.45412	1.04718	37.8448	85.7995	1.86761	12.3329	200	60	10	74.8771	2.91667
			Water Oak	53.6539	7.45412	1.04718	37.8448	85.7995	1.86761	12.3329	400	60	10	38.8589	17.7083
			Water Oak	53.6539	7.45412	1.04718	37.8448	85.7995	1.86761	12.3329	600	60	10	27.0362	31.875
			Water Oak	53.6539	7.45412	1.04718	37.8448	85.7995	1.86761	12.3329	800	60	10	25.633	52.9167
			Biosolids	58.4863	7.70844	5.6983	28.107	54.6672	38.1914	7.14131	200	60	10	75.2653	67.0833
			Biosolids	58.4863	7.70844	5.6983	28.107	54.6672	38.1914	7.14131	400	60	10	48.7383	67.2917
			Biosolids	58.4863	7.70844	5.6983	28.107	54.6672	38.1914	7.14131	600	60	10	33.0119	55.4167
			Biosolids	58.4863	7.70844	5.6983	28.107	54.6672	38.1914	7.14131	800	60	10	30.1187	53.125
[12]	Thermochemical and pore properties of goat-manure-derived biochars prepared from different pyrolysis temperatures	https://doi.org/10.1016/j.jaap.2014.07.004	goat manure	45.0197	6.56934	2.18978	46.2212	76.1227	18.9485	4.92881	400	30	10	44.5	3.27
			goat manure	45.0197	6.56934	2.18978	46.2212	76.1227	18.9485	4.92881	500	30	10	40.6	1.68
			goat manure	45.0197	6.56934	2.18978	46.2212	76.1227	18.9485	4.92881	600	30	10	37.9	13.92
			goat manure	45.0197	6.56934	2.18978	46.2212	76.1227	18.9485	4.92881	700	30	10	35.5	39.08
			goat manure	45.0197	6.56934	2.18978	46.2212	76.1227	18.9485	4.92881	800	30	10	33.8	93.49
[13]	Influence of pyrolysis temperature on properties and environmental safety of heavy metals in biochars derived from municipal sewage sludge	https://doi.org/10.1016/j.jhazmat.2016.08.050	Municipal biosolids	45.1789	10.6303	6.9506	35.707		41.3		400	60	50	60.57	5.49
			Municipal biosolids	45.1789	10.6303	6.9506	35.707		41.3		450	60	50	59.55	7.21
			Municipal biosolids	45.1789	10.6303	6.9506	35.707		41.3		500	60	50	59.01	7.73
			Municipal biosolids	45.1789	10.6303	6.9506	35.707		41.3		550	60	50	58.76	8.45
			Municipal biosolids	45.1789	10.6303	6.9506	35.707		41.3		600	60	50	53.09	5.99
[14]	Characteristics of biochar produced from yak manure at different pyrolysis temperatures and its effects on the yield and growth of highland barley	https://doi.org/10.1080/09542299.2018.1487774	yak manure	45.4144	6.74033	3.9779	43.8674				300	180	10		3.6
			yak manure	45.4144	6.74033	3.9779	43.8674				500	180	10		17.3
			yak manure	45.4144	6.74033	3.9779	43.8674				700	180	10		82.9
[15]	Slow pyrolysis of chemically treated walnut shell for valuable products: Effect of process parameters and in-depth product analysis	https://doi.org/10.1016/j.energy.2019.05.214	walnut shell	45.8962	5.70984	1.62225	46.7717	77.3189	1.78378	20.8973	300	60	15		5.895
			walnut shell	45.8962	5.70984	1.62225	46.7717	77.3189	1.78378	20.8973	400	60	15		10.129
			walnut shell	45.8962	5.70984	1.62225	46.7717	77.3189	1.78378	20.8973	500	60	15		81.487
			walnut shell	45.8962	5.70984	1.62225	46.7717	77.3189	1.78378	20.8973	600	60	15		202.846
[16]	Thermogravimetric, thermochemical, and infrared spectral characterization of feedstocks and biochar derived at different pyrolysis temperatures	https://doi.org/10.1016/j.wasman.2018.05.048	swichgrass	46.2819	6.6925	1.48722	45.5383	82.43			200	60	10
			swichgrass	46.2819	6.6925	1.48722	45.5383	82.43			400	60	10
			swichgrass	46.2819	6.6925	1.48722	45.5383	82.43			600	60	10
			swichgrass	46.2819	6.6925	1.48722	45.5383	82.43			800	60	10
			biosolid	53.1143	7.72703	5.81332	33.3454	52.47			200	60	10
			biosolid	53.1143	7.72703	5.81332	33.3454	52.47			400	60	10
			biosolid	53.1143	7.72703	5.81332	33.3454	52.47			600	60	10
			biosolid	53.1143	7.72703	5.81332	33.3454	52.47			800	60	10
			water oak	55.2308	6.08202	0.728129	37.9591	75.56			200	60	10
			water oak	55.2308	6.08202	0.728129	37.9591	75.56			400	60	10
			water oak	55.2308	6.08202	0.728129	37.9591	75.56			600	60	10
			water oak	55.2308	6.08202	0.728129	37.9591	75.56			800	60	10
[17]	Effect of self-purging pyrolysis on yield of biochar from maize cobs, husks and leaves	https://doi.org/10.1016/j.biortech.2016.06.114	Husks	46.3362	6.20427	0.494692	46.9649	74.24	2.97	22.79	450	30	5	23.82
			Husks	46.3362	6.20427	0.494692	46.9649	74.24	2.97	22.79	300	33	5	30.56
			Husks	46.3362	6.20427	0.494692	46.9649	74.24	2.97	22.79	300	60	5	30.68
			Husks	46.3362	6.20427	0.494692	46.9649	74.24	2.97	22.79	600	60	5	22.16
			Husks	46.3362	6.20427	0.494692	46.9649	74.24	2.97	22.79	450	90	5	22.6
			Husks	46.3362	6.20427	0.494692	46.9649	74.24	2.97	22.79	300	30	10	29.93
			Husks	46.3362	6.20427	0.494692	46.9649	74.24	2.97	22.79	600	30	10	22.01
			Husks	46.3362	6.20427	0.494692	46.9649	74.24	2.97	22.79	300	60	10
			Husks	46.3362	6.20427	0.494692	46.9649	74.24	2.97	22.79	450	60	10	23.23
			Husks	46.3362	6.20427	0.494692	46.9649	74.24	2.97	22.79	450	60	10	23.19
			Husks	46.3362	6.20427	0.494692	46.9649	74.24	2.97	22.79	450	60	10	22.53
			Husks	46.3362	6.20427	0.494692	46.9649	74.24	2.97	22.79	300	90	10	27.55
			Husks	46.3362	6.20427	0.494692	46.9649	74.24	2.97	22.79	600	90	10	21.47
			Husks	46.3362	6.20427	0.494692	46.9649	74.24	2.97	22.79	450	30	15	23.68
			Husks	46.3362	6.20427	0.494692	46.9649	74.24	2.97	22.79	300	60	15	27.43
			Husks	46.3362	6.20427	0.494692	46.9649	74.24	2.97	22.79	600	60	15	21.65
			Husks	46.3362	6.20427	0.494692	46.9649	74.24	2.97	22.79	450	90	15	22.19
			Cobs	47.649	6.17447	0.619478	45.557	72.95	1.54	25.51	300	30	5	33.8
			Cobs	47.649	6.17447	0.619478	45.557	72.95	1.54	25.51	450	30	5	24.61
			Cobs	47.649	6.17447	0.619478	45.557	72.95	1.54	25.51	300	60	5	31.86
			Cobs	47.649	6.17447	0.619478	45.557	72.95	1.54	25.51	600	60	5	22.68
			Cobs	47.649	6.17447	0.619478	45.557	72.95	1.54	25.51	450	90	5	23.95
			Cobs	47.649	6.17447	0.619478	45.557	72.95	1.54	25.51	300	30	10	33.42
			Cobs	47.649	6.17447	0.619478	45.557	72.95	1.54	25.51	600	30	10	22.7
			Cobs	47.649	6.17447	0.619478	45.557	72.95	1.54	25.51	300	60	10
			Cobs	47.649	6.17447	0.619478	45.557	72.95	1.54	25.51	450	60	10	23.73
			Cobs	47.649	6.17447	0.619478	45.557	72.95	1.54	25.51	450	60	10	23.57
			Cobs	47.649	6.17447	0.619478	45.557	72.95	1.54	25.51	450	60	10	23.44
			Cobs	47.649	6.17447	0.619478	45.557	72.95	1.54	25.51	300	90	10	30.11
			Cobs	47.649	6.17447	0.619478	45.557	72.95	1.54	25.51	600	90	10	21.8
			Cobs	47.649	6.17447	0.619478	45.557	72.95	1.54	25.51	450	30	15	24.06
			Cobs	47.649	6.17447	0.619478	45.557	72.95	1.54	25.51	300	60	15	30.63
			Cobs	47.649	6.17447	0.619478	45.557	72.95	1.54	25.51	600	60	15	21.97
			Cobs	47.649	6.17447	0.619478	45.557	72.95	1.54	25.51	450	90	15	22.33
			Leaves	48.2652	6.43094	1.17127	44.0663	67.78	9.49	22.73	450	30	5	28.62
			Leaves	48.2652	6.43094	1.17127	44.0663	67.78	9.49	22.73	300	60	5	34.69
			Leaves	48.2652	6.43094	1.17127	44.0663	67.78	9.49	22.73	600	60	5	26.87
			Leaves	48.2652	6.43094	1.17127	44.0663	67.78	9.49	22.73	450	90	5	27.17
			Leaves	48.2652	6.43094	1.17127	44.0663	67.78	9.49	22.73	300	30	10	38.27
			Leaves	48.2652	6.43094	1.17127	44.0663	67.78	9.49	22.73	600	30	10	27.12
			Leaves	48.2652	6.43094	1.17127	44.0663	67.78	9.49	22.73	300	60	10
			Leaves	48.2652	6.43094	1.17127	44.0663	67.78	9.49	22.73	450	60	10	28.58
			Leaves	48.2652	6.43094	1.17127	44.0663	67.78	9.49	22.73	450	60	10	27.75
			Leaves	48.2652	6.43094	1.17127	44.0663	67.78	9.49	22.73	450	60	10	27.52
			Leaves	48.2652	6.43094	1.17127	44.0663	67.78	9.49	22.73	300	90	10	32.84
			Leaves	48.2652	6.43094	1.17127	44.0663	67.78	9.49	22.73	600	90	10	25.7
			Leaves	48.2652	6.43094	1.17127	44.0663	67.78	9.49	22.73	300	30	15	36.38
			Leaves	48.2652	6.43094	1.17127	44.0663	67.78	9.49	22.73	450	30	15	29.36
			Leaves	48.2652	6.43094	1.17127	44.0663	67.78	9.49	22.73	300	60	15	35.75
			Leaves	48.2652	6.43094	1.17127	44.0663	67.78	9.49	22.73	600	60	15	26.71
			Leaves	48.2652	6.43094	1.17127	44.0663	67.78	9.49	22.73	450	90	15	26.82
[18]	Effects of pyrolysis temperature on properties of swine manure biochar and its environmental risks of heavy metals	https://doi.org/10.1016/j.jaap.2020.104945	swine manure	46.6641	6.47898	5.0135	40.3651		22.2		200	120	15	88.5
			swine manure	46.6641	6.47898	5.0135	40.3651		22.2		300	120	15	63
			swine manure	46.6641	6.47898	5.0135	40.3651		22.2		400	120	15	50.8
			swine manure	46.6641	6.47898	5.0135	40.3651		22.2		500	120	15	46.2
			swine manure	46.6641	6.47898	5.0135	40.3651		22.2		600	120	15	44.2
			swine manure	46.6641	6.47898	5.0135	40.3651		22.2		700	120	15	44
[19]	Physicochemical properties evolution of chars from palm kernel shell pyrolysis	https://doi.org/10.1007/s10973-018-7185-z	palm kernel shell	47.0146	5.42977	0.490884	47.0447	71.2137	3.12369	25.6626	400	30	5	46.68	4.5
			palm kernel shell	47.0146	5.42977	0.490884	47.0447	71.2137	3.12369	25.6626	500	30	5	37.46	12
			palm kernel shell	47.0146	5.42977	0.490884	47.0447	71.2137	3.12369	25.6626	600	30	5	35.4	260
			palm kernel shell	47.0146	5.42977	0.490884	47.0447	71.2137	3.12369	25.6626	700	30	5	32.78	370
[20]	Effects of steam activation on the pore structure and surface chemistry of activated carbon derived from bamboo waste	https://doi.org/10.1016/j.apsusc.2014.07.126	Waste bamboo materials	47.1	6.5	0.6	45.8	71.7	1.7	26.6	450	60	5	29.4	363
[21]	Characterization of cadmium removal from aqueous solution by biochar produced from a giant Miscanthus at different pyrolytic temperatures	https://doi.org/10.1016/j.biortech.2013.03.186	Geodae-Uksae 1	47.1718	6.15194	0.247729	46.4286	82.5883	0.904928	16.5068	300	60	10		0.56
			Geodae-Uksae 1	47.1718	6.15194	0.247729	46.4286	82.5883	0.904928	16.5068	400	60	10		2.41
			Geodae-Uksae 1	47.1718	6.15194	0.247729	46.4286	82.5883	0.904928	16.5068	500	60	10		181
			Geodae-Uksae 1	47.1718	6.15194	0.247729	46.4286	82.5883	0.904928	16.5068	600	60	10		381.5
[22]	Textural and chemical properties of swine-manure-derived biochar pertinent to its potential use as a soil amendment	https://doi.org/10.1016/j.chemosphere.2012.05.085	Swine manure	47.3094	7.3991	4.4843	40.8072		18.1		400	60	10	39	5.7
			Swine manure	47.3094	7.3991	4.4843	40.8072		18.1		500	60	10	37	3.9
			Swine manure	47.3094	7.3991	4.4843	40.8072		18.1		600	60	10	36	3.4
			Swine manure	47.3094	7.3991	4.4843	40.8072		18.1		700	60	10	34	59
			Swine manure	47.3094	7.3991	4.4843	40.8072		18.1		800	60	10	34	63
[23]	Characteristics of biochar produced from slow pyrolysis of Geodae-Uksae 1	https://doi.org/10.1016/j.biortech.2012.12.012	Geodae-Uksae 1	47.6	5.5	0.8	46.1	78.9644	3.8835	17.1521	300	60	10	49.54	0.49
			Geodae-Uksae 2	47.6	5.5	0.8	46.1	78.9644	3.8835	17.1521	400	60	10	30.95	3.11
			Geodae-Uksae 3	47.6	5.5	0.8	46.1	78.9644	3.8835	17.1521	450	60	10	29.42	21.93
			Geodae-Uksae 4	47.6	5.5	0.8	46.1	78.9644	3.8835	17.1521	500	60	10	27.15	180.96
			Geodae-Uksae 5	47.6	5.5	0.8	46.1	78.9644	3.8835	17.1521	600	60	10	25.92	293.04
			Geodae-Uksae 6	47.6	5.5	0.8	46.1	78.9644	3.8835	17.1521	700	60	10	25.1	368.98
[24]	Preparation of biochar from food waste digestate: Pyrolysis behavior and product properties	https://doi.org/10.1016/j.biortech.2020.122841	food waste digestate	48.4686	5.39036	2.13832	43.8802	66.1	10.21	23.69	400	120	10	44.26
			food waste digestate	48.4686	5.39036	2.13832	43.8802	66.1	10.21	23.69	500	120	10	42.97
			food waste digestate	48.4686	5.39036	2.13832	43.8802	66.1	10.21	23.69	600	120	10	41.8
			food waste digestate	48.4686	5.39036	2.13832	43.8802	66.1	10.21	23.69	700	120	10	37.57
			food waste digestate	48.4686	5.39036	2.13832	43.8802	66.1	10.21	23.69	800	120	10	36.13
[25]	Slow pyrolysis of rice straw: Analysis of products properties, carbon and energy yields	https://doi.org/10.1016/j.biortech.2013.12.084	rice straw	48.75	5.98	1.99	43.28	60.84	22.55	16.61	300	60	12	50.27	4.5
			rice straw	48.75	5.98	1.99	43.28	60.84	22.55	16.61	400	60	12	33.49	21.2
			rice straw	48.75	5.98	1.99	43.28	60.84	22.55	16.61	500	60	12	28.18	45.8
			rice straw	48.75	5.98	1.99	43.28	60.84	22.55	16.61	600	60	12	26.08	84.8
			rice straw	48.75	5.98	1.99	43.28	60.84	22.55	16.61	700	60	12	25.72	22.5
[26]	Comparison of biochar properties from biomass residues produced by slow pyrolysis at 500°C	https://doi.org/10.1016/j.biortech.2013.08.135	Paddy straw	48.75	5.98	1.99	43.28	60.8414	22.5458	16.6127	500	60	10	41	45.8
			Wood stem	50.52	5.81	0.23	43.44	87.8289	0.438596	11.7325	500	60	10	22.3	316
			Bagasse	51.71	5.32	0.33	42.64	81.7972	2.41935	15.7834	500	60	10	24.5	202
			Wood bark	53.42	6.12	1.4	39.06	76.5556	5.44444	18	500	60	10	31.9	13.6
			PKS	55.8144	5.61944	0.839916	37.7262	75.8229	3.85925	20.3178	500	60	10	32.2	191
			Cocopeat	61.57	4.37	1.02	33.04	62.1519	5.82278	32.0253	500	60	10	38.7	13.7
[27]	Impact of pyrolysis temperature and manure source on physicochemical characteristics of biochar	https://doi.org/10.1016/j.biortech.2011.11.084	Poultry litter (PL)	48.7678	6.05114	4.24621	40.2638	74.3	16.9	8.8	350	120	2.5	54.3	3.93
			Poultry litter (PL)	48.7678	6.05114	4.24621	40.2638	74.3	16.9	8.8	700	120	8.33	36.7	50.9
			Turkey litter (TL)	50.7974	6.32927	4.30742	37.9631	74	20.3	5.7	350	120	2.5	58.1	2.6
			Turkey litter (TL)	50.7974	6.32927	4.30742	37.9631	74	20.3	5.7	700	120	8.33	39.9	66.7
			Paved-feedlot (FL)	52.5058	6.37529	2.76224	37.8438	76.7	15.4	7.9	350	120	2.5	51.1	1.34
			Paved-feedlot (FL)	52.5058	6.37529	2.76224	37.8438	76.7	15.4	7.9	700	120	8.33	32.2	145.2
			Dairy manure（DM)	53.0142	6.25641	2.60969	37.8348	80.7	14.8	4.5	350	120	2.5	54.9	1.64
			Dairy manure（DM)	53.0142	6.25641	2.60969	37.8348	80.7	14.8	4.5	700	120	8.33	35	186.5
			Swine solids (SW)	56.0852	7.10822	4.86103	30.8338	73.5265	20.8791	5.59441	350	120	2.5	62.3	0.92
			Swine solids (SW)	56.0852	7.10822	4.86103	30.8338	73.5265	20.8791	5.59441	700	120	8.33	36.4	4.11
[28]	Operating conditions-induced changes in product yield and characteristics during thermal-conversion of peanut shell to biochar in relation to economic analysis	https://doi.org/10.1016/j.jclepro.2018.05.034	peanut shell	48.8671	6.24617	0.326597	44.0906	77.7517	2.15444	20.0939	500	60	1	39.6907	13.54
			peanut shell	48.8671	6.24617	0.326597	44.0906	77.7517	2.15444	20.0939	500	60	2	37.6289	14.36
			peanut shell	48.8671	6.24617	0.326597	44.0906	77.7517	2.15444	20.0939	500	60	5	36.0825	14.95
			peanut shell	48.8671	6.24617	0.326597	44.0906	77.7517	2.15444	20.0939	500	15	10	38.6598	12.35
			peanut shell	48.8671	6.24617	0.326597	44.0906	77.7517	2.15444	20.0939	500	30	10	37.6289	13.45
			peanut shell	48.8671	6.24617	0.326597	44.0906	77.7517	2.15444	20.0939	300	60	10	57.216	7.12
			peanut shell	48.8671	6.24617	0.326597	44.0906	77.7517	2.15444	20.0939	400	60	10	40.722	12.78
			peanut shell	48.8671	6.24617	0.326597	44.0906	77.7517	2.15444	20.0939	500	60	10	35.567	15.88
			peanut shell	48.8671	6.24617	0.326597	44.0906	77.7517	2.15444	20.0939	500	60	10	35.052	15.88
			peanut shell	48.8671	6.24617	0.326597	44.0906	77.7517	2.15444	20.0939	600	60	10	32.98	17.65
			peanut shell	48.8671	6.24617	0.326597	44.0906	77.7517	2.15444	20.0939	700	60	10	30.928	16.78
			peanut shell	48.8671	6.24617	0.326597	44.0906	77.7517	2.15444	20.0939	500	90	10	33.5052	18.12
[29]	Pyrolysis polygeneration of poplar wood: Effect of heating rate and pyrolysis temperature	https://doi.org/10.1016/j.biortech.2016.07.049	Poplar wood (Populus alba)	48.9127	5.99777	0.525943	44.4422	78.26	1.13	20.61	400	10	10	59.835	211.435
			Poplar wood (Populus alba)	48.9127	5.99777	0.525943	44.4422	78.26	1.13	20.61	450	10	10	55.664	224.471
			Poplar wood (Populus alba)	48.9127	5.99777	0.525943	44.4422	78.26	1.13	20.61	500	10	10	53.306	346.255
			Poplar wood (Populus alba)	48.9127	5.99777	0.525943	44.4422	78.26	1.13	20.61	550	10	10	52.538	386.801
			Poplar wood (Populus alba)	48.9127	5.99777	0.525943	44.4422	78.26	1.13	20.61	600	10	10	48.359	407.338
			Poplar wood (Populus alba)	48.9127	5.99777	0.525943	44.4422	78.26	1.13	20.61	400	10	30	56.835	250.338
			Poplar wood (Populus alba)	48.9127	5.99777	0.525943	44.4422	78.26	1.13	20.61	450	10	30	54.159	293.374
			Poplar wood (Populus alba)	48.9127	5.99777	0.525943	44.4422	78.26	1.13	20.61	500	10	30	50.798	367.659
			Poplar wood (Populus alba)	48.9127	5.99777	0.525943	44.4422	78.26	1.13	20.61	550	10	30	49.027	400.7
			Poplar wood (Populus alba)	48.9127	5.99777	0.525943	44.4422	78.26	1.13	20.61	600	10	30	47.713	418.732
			Poplar wood (Populus alba)	48.9127	5.99777	0.525943	44.4422	78.26	1.13	20.61	400	10	50	56.16	179.235
			Poplar wood (Populus alba)	48.9127	5.99777	0.525943	44.4422	78.26	1.13	20.61	450	10	50	50.322	248.52
			Poplar wood (Populus alba)	48.9127	5.99777	0.525943	44.4422	78.26	1.13	20.61	500	10	50	49.285	312.811
			Poplar wood (Populus alba)	48.9127	5.99777	0.525943	44.4422	78.26	1.13	20.61	550	10	50	47.778	342.107
			Poplar wood (Populus alba)	48.9127	5.99777	0.525943	44.4422	78.26	1.13	20.61	600	10	50	46.957	391.393
[30]	Pyrolysis/gasification of pine sawdust biomass briquettes under carbon dioxide atmosphere: Study on carbon dioxide reduction (utilization) and biochar briquettes physicochemical properties	https://doi.org/10.1016/j.biortech.2017.11.012	pinewood sawdust	49.1	5.55	0.45	44.9	82.7486	0.529375	16.722	400	10	20	26.808
			pinewood sawdust	49.1	5.55	0.45	44.9	82.7486	0.529375	16.722	500	10	20	25.191
			pinewood sawdust	49.1	5.55	0.45	44.9	82.7486	0.529375	16.722	600	10	20	22.723	313.51
			pinewood sawdust	49.1	5.55	0.45	44.9	82.7486	0.529375	16.722	600	10	20	22.383
			pinewood sawdust	49.1	5.55	0.45	44.9	82.7486	0.529375	16.722	600	10	20	22.34
			pinewood sawdust	49.1	5.55	0.45	44.9	82.7486	0.529375	16.722	600	10	20	22.1277
			pinewood sawdust	49.1	5.55	0.45	44.9	82.7486	0.529375	16.722	600	10	20	21.1915
			pinewood sawdust	49.1	5.55	0.45	44.9	82.7486	0.529375	16.722	600	10	20	20.5106
			pinewood sawdust	49.1	5.55	0.45	44.9	82.7486	0.529375	16.722	700	10	20	21.149
			pinewood sawdust	49.1	5.55	0.45	44.9	82.7486	0.529375	16.722	800	10	20	19.745
[31]	Structural evolution of maize stalk/char particles during pyrolysis	https://doi.org/10.1016/j.biortech.2009.05.009	Maize stalk	49.27	6.55	1.56	42.62	80.7529	6.04454	13.2025	150	10	10		1.8283
			Maize stalk	49.27	6.55	1.56	42.62	80.7529	6.04454	13.2025	200	10	10		1.70297
			Maize stalk	49.27	6.55	1.56	42.62	80.7529	6.04454	13.2025	250	10	10	81.66	1.58596
			Maize stalk	49.27	6.55	1.56	42.62	80.7529	6.04454	13.2025	300	10	10	52.04	2.66879
			Maize stalk	49.27	6.55	1.56	42.62	80.7529	6.04454	13.2025	350	10	10		4.2276
			Maize stalk	49.27	6.55	1.56	42.62	80.7529	6.04454	13.2025	400	10	10	28.76	4.98694
			Maize stalk	49.27	6.55	1.56	42.62	80.7529	6.04454	13.2025	500	10	10	25.68	7.40012
			Maize stalk	49.27	6.55	1.56	42.62	80.7529	6.04454	13.2025	600	10	10		6.70856
			Maize stalk	49.27	6.55	1.56	42.62	80.7529	6.04454	13.2025	700	10	10		5.84557
			Maize stalk	49.27	6.55	1.56	42.62	80.7529	6.04454	13.2025	800	10	10		5.03993
[32]	Subcritical Water Hydrolysis of Microalgal Biomass for Protein and Pyrolytic Bio-oil Recovery	https://doi.org/10.1007/s12155-017-9859-y	Chlorella vulgaris	49.3302	6.37424	9.77744	34.5182	75.5104	7.48969	16.9999	150	90	10	75.9747
[33]	Contrasting effects of operating conditions and biomass particle size on bulk characteristics and surface chemistry of rice husk derived-biochars	https://doi.org/10.1016/j.jaap.2018.06.018	rice husk	49.4614	6.96166	1.42477	41.6657	67.4747	14.5667	17.9585	500	60	1	40.7982	16.34
			rice husk	49.4614	6.96166	1.42477	41.6657	67.4747	14.5667	17.9585	500	60	2	40.1011	17.45
			rice husk	49.4614	6.96166	1.42477	41.6657	67.4747	14.5667	17.9585	500	60	5	39.7435	19.64
			rice husk	49.4614	6.96166	1.42477	41.6657	67.4747	14.5667	17.9585	500	15	10	40.5191	18.95
			rice husk	49.4614	6.96166	1.42477	41.6657	67.4747	14.5667	17.9585	500	30	10	39.4811	19.57
			rice husk	49.4614	6.96166	1.42477	41.6657	67.4747	14.5667	17.9585	300	60	10	56.9803	6.54
			rice husk	49.4614	6.96166	1.42477	41.6657	67.4747	14.5667	17.9585	400	60	10	44.3364	12.5
			rice husk	49.4614	6.96166	1.42477	41.6657	67.4747	14.5667	17.9585	500	60	10	37.2922	27.92
			rice husk	49.4614	6.96166	1.42477	41.6657	67.4747	14.5667	17.9585	500	60	10	38.7813	20.11
			rice husk	49.4614	6.96166	1.42477	41.6657	67.4747	14.5667	17.9585	600	60	10	36.7957	22.47
			rice husk	49.4614	6.96166	1.42477	41.6657	67.4747	14.5667	17.9585	700	60	10	36.7816	25.87
			rice husk	49.4614	6.96166	1.42477	41.6657	67.4747	14.5667	17.9585	500	90	10	37.742	22.49
[34]	Effects of residence time on characteristics of biochars prepared via co-pyrolysis of sewage sludge and cotton stalks	https://doi.org/10.1016/j.jaap.2019.104659	sewage sludge +cotton stalks (1:1）	50.7693	4.79542	4.02953	40.4057	63.3394	27.6151	9.04551	600	30	5		9.17
			sewage sludge +cotton stalks (1:1）	50.7693	4.79542	4.02953	40.4057	63.3394	27.6151	9.04551	600	60	5		25.9
			sewage sludge +cotton stalks (1:1）	50.7693	4.79542	4.02953	40.4057	63.3394	27.6151	9.04551	600	90	5		31.33
			sewage sludge +cotton stalks (1:1）	50.7693	4.79542	4.02953	40.4057	63.3394	27.6151	9.04551	600	120	5		23.59
			sewage sludge +cotton stalks (1:1）	50.7693	4.79542	4.02953	40.4057	63.3394	27.6151	9.04551	600	150	5		21.48
[35]	The effect of temperature and heating rate on char properties obtained from solar pyrolysis of beech wood	https://doi.org/10.1016/j.biortech.2015.01.112	Beech wood pellets	50.8407	5.90472	0.30024	42.9343	85.3	0.4	14.3	800	6	300	13.5
[36]	Influence of feedstock source and pyrolysis temperature on biochar bulk and surface properties	https://doi.org/10.1016/j.biombioe.2015.11.010	wood hybrid poplar	51.0121	7.89474	1.21457	39.8785		1		350	30	190	31.9
			wood hybrid poplar	51.0121	7.89474	1.21457	39.8785		1		400	30	190	28.3
			wood hybrid poplar	51.0121	7.89474	1.21457	39.8785		1		450	30	190	26.6
			wood hybrid poplar	51.0121	7.89474	1.21457	39.8785		1		500	30	190	25.5
			wood hybrid poplar	51.0121	7.89474	1.21457	39.8785		1		550	30	190	21.8	181.586
			wood hybrid poplar	51.0121	7.89474	1.21457	39.8785		1		600	30	190	20.4	223.024
			Douglas fir wood	51.3514	8.20821	0.4004	40.04		0.3		350	30	190	38.3
			Douglas fir wood	51.3514	8.20821	0.4004	40.04		0.3		400	30	190	27
			Douglas fir wood	51.3514	8.20821	0.4004	40.04		0.3		450	30	190	21.2
			Douglas fir wood	51.3514	8.20821	0.4004	40.04		0.3		500	30	190	20.1
			Douglas fir wood	51.3514	8.20821	0.4004	40.04		0.3		550	30	190	18.6	478.741
			Douglas fir wood	51.3514	8.20821	0.4004	40.04		0.3		600	30	190	16	525.863
			Douglas fir bark	54.7131	7.78689	0.819672	36.6803		2.4		350	30	190	47.9
			Douglas fir bark	54.7131	7.78689	0.819672	36.6803		2.4		400	30	190	41.1
			Douglas fir bark	54.7131	7.78689	0.819672	36.6803		2.4		450	30	190	35.5
			Douglas fir bark	54.7131	7.78689	0.819672	36.6803		2.4		500	30	190	30.5
			Douglas fir bark	54.7131	7.78689	0.819672	36.6803		2.4		550	30	190	29.8
			Douglas fir bark	54.7131	7.78689	0.819672	36.6803		2.4		600	30	190	29.6
[37]	Influence of pyrolysis temperature on chemical speciation, leaching ability, and environmental risk of heavy metals in biochar derived from cow manure	https://doi.org/10.1016/j.biortech.2020.122850	cow manure	52.0362	6.9793	3.55135	36.2951	57.46	27.07	15.47	300	60	20
			cow manure	52.0362	6.9793	3.55135	36.2951	57.46	27.07	15.47	400	60	20
			cow manure	52.0362	6.9793	3.55135	36.2951	57.46	27.07	15.47	500	60	20
			cow manure	52.0362	6.9793	3.55135	36.2951	57.46	27.07	15.47	600	60	20
			cow manure	52.0362	6.9793	3.55135	36.2951	57.46	27.07	15.47	700	60	20
[38]	On the self-heating behavior of upgraded biochar pellets blended with pyrolysis oil: Effects of process parameters	https://doi.org/10.1016/j.fuel.2020.118395	spruce wood	53.2	6.1	0.1	40.6	80.6	0.8	18.6	450	60	10
			spruce wood	53.2	6.1	0.1	40.6	80.6	0.8	18.6	600	60	10
			spruce wood	53.2	6.1	0.1	40.6	80.6	0.8	18.6	750	60	10
[39]	Temperature effect on biochar produced from tea (Camellia sinensis L.) pruning litters: A comprehensive treatise on physico-chemical and statistical approaches	https://doi.org/10.1016/j.biortech.2020.124023	MPL(tea)	55.2355	5.89059	1.58016	37.2937	84.0415	4.12435	11.8342	250	180	25	61.5497	40.6568
			MPL(tea)	55.2355	5.89059	1.58016	37.2937	84.0415	4.12435	11.8342	300	180	25	60.614	80.2494
			MPL(tea)	55.2355	5.89059	1.58016	37.2937	84.0415	4.12435	11.8342	350	180	25	58.6257	87.2869
			MPL(tea)	55.2355	5.89059	1.58016	37.2937	84.0415	4.12435	11.8342	400	180	25	54.883	90.2575
			MPL(tea)	55.2355	5.89059	1.58016	37.2937	84.0415	4.12435	11.8342	450	180	25	53.8889	98.3094
			MPL(tea)	55.2355	5.89059	1.58016	37.2937	84.0415	4.12435	11.8342	500	180	25	53.655	113.492
			TV1PL	56.8943	4.89951	1.61984	36.5863	79.5591	4.50557	15.9354	350	180	25	56.5205	68.462
			TV1PL	56.8943	4.89951	1.61984	36.5863	79.5591	4.50557	15.9354	400	180	25	56.2865	87.7058
			TV1PL	56.8943	4.89951	1.61984	36.5863	79.5591	4.50557	15.9354	450	180	25	56.1696	100.848
			TV1PL	56.8943	4.89951	1.61984	36.5863	79.5591	4.50557	15.9354	500	180	25	56.2281	125.185
			TV1PL	56.8943	4.89951	1.61984	36.5863	79.5591	4.50557	15.9354	250	180	25	60.2632	51.3378
			TV1PL	56.8943	4.89951	1.61984	36.5863	79.5591	4.50557	15.9354	300	180	25	58.5673	60.4071
			TV25PL	57.2843	3.9996	1.65983	37.0563	75.1063	6.79019	18.1035	250	180	25	58.6842	36.0776
			TV25PL	57.2843	3.9996	1.65983	37.0563	75.1063	6.79019	18.1035	300	180	25	57.6316	62.4435
			TV25PL	57.2843	3.9996	1.65983	37.0563	75.1063	6.79019	18.1035	350	180	25	56.2281	133.583
			TV25PL	57.2843	3.9996	1.65983	37.0563	75.1063	6.79019	18.1035	400	180	25	56.345	224.05
			TV25PL	57.2843	3.9996	1.65983	37.0563	75.1063	6.79019	18.1035	450	180	25	55.2924	261.608
			TV25PL	57.2843	3.9996	1.65983	37.0563	75.1063	6.79019	18.1035	500	180	25	55.2339	305.276
			TV22PL	57.2843	4.39956	1.89981	36.4164	77.7025	5.81047	16.4871	250	180	25	56.5205	40.6553
			TV22PL	57.2843	4.39956	1.89981	36.4164	77.7025	5.81047	16.4871	300	180	25	55.5848	49.7247
			TV22PL	57.2843	4.39956	1.89981	36.4164	77.7025	5.81047	16.4871	350	180	25	53.3626	55.7447
			TV22PL	57.2843	4.39956	1.89981	36.4164	77.7025	5.81047	16.4871	400	180	25	52.1345	72.9595
			TV22PL	57.2843	4.39956	1.89981	36.4164	77.7025	5.81047	16.4871	450	180	25	51.7836	75.9242
			TV22PL	57.2843	4.39956	1.89981	36.4164	77.7025	5.81047	16.4871	500	180	25	51.8421	121.624
[40]	Influence of pyrolysis temperature and heating rate on the production of bio-oil and char from safflower seed by pyrolysis, using a well-swept fixed-bed reactor	https://doi.org/10.1016/j.fuproc.2007.01.001	safflower seed	60.46	9.08	3.1	27.36	85.684	2.33298	11.983	400	10	100	28.43	0.73
			safflower seed	60.46	9.08	3.1	27.36	85.684	2.33298	11.983	600	10	100	17.53	4.91
			safflower seed	60.46	9.08	3.1	27.36	85.684	2.33298	11.983	700	10	100	15.38	4.02
			safflower seed	60.46	9.08	3.1	27.36	85.684	2.33298	11.983	400	10	300	24.87	1.24
			safflower seed	60.46	9.08	3.1	27.36	85.684	2.33298	11.983	600	10	300	16.8	5.73
			safflower seed	60.46	9.08	3.1	27.36	85.684	2.33298	11.983	700	10	300	15.66	4.32
[41]	Trichloroethylene adsorption by pine needle biochars produced at various pyrolysis temperatures	https://doi.org/10.1016/j.biortech.2013.06.033	Pine needles	74.52	6.54	3.94	15	65.19	1.99		300	180	7	57.57	4.09
			Pine needles	74.52	6.54	3.94	15	65.19	1.99		500	180	7	31.82	13.06
			Pine needles	74.52	6.54	3.94	15	65.19	1.99		700	180	7	24.95	390.52
[42]	Sorption of apolar and polar organic contaminants by waste tire rubber and its chars in single- and bi-solute systems	https://doi.org/10.1016/j.envpol.2011.01.002	Tire rubber	83.1659	8.97281	0.629436	7.23182		23.8		200	120	10	93.5
			Tire rubber	83.1659	8.97281	0.629436	7.23182		23.8		400	120	10	59.3	24.2
			Tire rubber	83.1659	8.97281	0.629436	7.23182		23.8		600	120	10	54.5	51.5
			Tire rubber	83.1659	8.97281	0.629436	7.23182		23.8		800	120	10	43	50
[43]	Tyre char preparation from waste tyre rubber for dye removal from effluents	https://doi.org/10.1016/j.jhazmat.2009.09.142	tyre rubber	87.6154	9.02554	0.397081	0.869285		6.82		500	120	1		122
			tyre rubber	87.6154	9.02554	0.397081	0.869285		6.82		500	60	5	38.45	86
			tyre rubber	87.6154	9.02554	0.397081	0.869285		6.82		400	120	5	50.1	10
			tyre rubber	87.6154	9.02554	0.397081	0.869285		6.82		500	120	5	35.15	117
			tyre rubber	87.6154	9.02554	0.397081	0.869285		6.82		500	120	5	37.15	156
			tyre rubber	87.6154	9.02554	0.397081	0.869285		6.82		500	120	5	37.15	156
			tyre rubber	87.6154	9.02554	0.397081	0.869285		6.82		500	120	5	37.15	156
			tyre rubber	87.6154	9.02554	0.397081	0.869285		6.82		500	120	5	37.15	156
			tyre rubber	87.6154	9.02554	0.397081	0.869285		6.82		600	120	5	35.43	136
			tyre rubber	87.6154	9.02554	0.397081	0.869285		6.82		700	120	5	34.93	96
			tyre rubber	87.6154	9.02554	0.397081	0.869285		6.82		800	120	5	33.71	85
			tyre rubber	87.6154	9.02554	0.397081	0.869285		6.82		500	180	5	37.05	95
			tyre rubber	87.6154	9.02554	0.397081	0.869285		6.82		500	240	5	35.06	94
			tyre rubber	87.6154	9.02554	0.397081	0.869285		6.82		500	120	10		95
			tyre rubber	87.6154	9.02554	0.397081	0.869285		6.82		500	120	20		94
[44]	Biochar potential evaluation of palm oil wastes through slow pyrolysis: Thermochemical characterization and pyrolytic kinetic studies	https://doi.org/10.1016/j.biortech.2017.03.105	palm oil sludge(POS)					29.8558	45.5365	24.6077	500	60	10	79.16
			empty fruit bunch(EFB)					75.492	11.4978	13.0102	500	60	10	35.14
			palm kernel shell(PKS)					66.0067	7.8986	26.0947	500	60	10	37.07
[45]	Influence of pyrolysis temperature and holding time on properties of biochar derived from medicinal herb (radix isatidis) residue and its effect on soil CO2 emission	https://doi.org/10.1016/j.jaap.2014.09.016	boiled radix isatidis residue					76	10.13	13.87	300	10	10		2.32
			boiled radix isatidis residue					76	10.13	13.87	500	10	10		3.63
			boiled radix isatidis residue					76	10.13	13.87	700	10	10		5.57
			boiled radix isatidis residue					76	10.13	13.87	300	90	10		3.78
			boiled radix isatidis residue					76	10.13	13.87	500	90	10		5.89
			boiled radix isatidis residue					76	10.13	13.87	700	90	10		8.68
			boiled radix isatidis residue					76	10.13	13.87	300	180	10		4.45
			boiled radix isatidis residue					76	10.13	13.87	500	180	10		8.5
			boiled radix isatidis residue					76	10.13	13.87	700	180	10		11.8
[46]	Effect of pyrolysis temperature, heating rate, and residence time on rapeseed stem derived biochar	https://doi.org/10.1016/j.jclepro.2017.11.013	Rapeseed stem					79.8	3.3	16.9	650	60	1	25.406	295.9
			Rapeseed stem					79.8	3.3	16.9	200	60	5		1
			Rapeseed stem					79.8	3.3	16.9	450	60	5		37.3
			Rapeseed stem					79.8	3.3	16.9	700	60	5		45.1
			Rapeseed stem					79.8	3.3	16.9	650	60	10	26.768	316.9
			Rapeseed stem					79.8	3.3	16.9	500	10	20	29.603	46.7
			Rapeseed stem					79.8	3.3	16.9	500	60	20	29.126	98.4
			Rapeseed stem					79.8	3.3	16.9	650	60	20	25.581	384.1
			Rapeseed stem					79.8	3.3	16.9	500	100	20	28.702	91.4
[47]	Effect of pyrolysis temperature on product yields of palm fibre and its biochar characteristics	https://doi.org/10.1016/j.mset.2020.06.003	palm fibr					59.41	2.82	37.77	300	120	5	54.83	0.0218
[48]	Influence of biomass components, temperature and pressure on the pyrolysis behavior and biochar properties of pine nut shells	https://doi.org/10.1016/j.biortech.2020.123682	pine nut shell (PNS)								400	20	5	46.4262
[49]	Characterization of biochar derived from rubber wood sawdust through slow pyrolysis on surface porosities and functional groups	https://doi.org/10.1016/j.proeng.2013.12.193	rubber wood sawdust					70		25	300	180	15		1.93
			rubber wood sawdust					70		25	500	180	15		2.011
			rubber wood sawdust					70		25	700	180	15		5.493
[50]	Bio- and hydrochars from rice straw and pig manure: Inter-comparison	https://doi.org/10.1016/j.biortech.2017.03.103	rice straw								300	90	25	57.7	3.35
			rice straw								500	90	25	33.8	7.47
			rice straw								700	90	25	30.7	32.9
{51]	Characterization of corncob-derived biochar and pyrolysis kinetics in comparison with corn stalk and sawdust	https://doi.org/10.1016/j.biortech.2014.07.077	Corncob	48.12	6.48	1.89	43.51	78.7089	3.28426	18.0068	400	30	15	36.9	180.1
			Corncob	48.12	6.48	1.89	43.51	78.7089	3.28426	18.0068	400	60	10	36.9	180.1
			Corncob	48.12	6.48	1.89	43.51	78.7089	3.28426	18.0068	400	90	5	36.9	180.1
			Corncob	48.12	6.48	1.89	43.51	78.7089	3.28426	18.0068	500	30	15	23.3	212.6
			Corncob	48.12	6.48	1.89	43.51	78.7089	3.28426	18.0068	500	60	10	23.3	212.6
			Corncob	48.12	6.48	1.89	43.51	78.7089	3.28426	18.0068	500	90	5	23.3	212.6
			Corncob	48.12	6.48	1.89	43.51	78.7089	3.28426	18.0068	600	30	15	21.7	192.9
			Corncob	48.12	6.48	1.89	43.51	78.7089	3.28426	18.0068	600	60	10	21.7	192.9
			Corncob	48.12	6.48	1.89	43.51	78.7089	3.28426	18.0068	600	90	5	21.7	192.9
			Corncob	48.12	6.48	1.89	43.51	78.7089	3.28426	18.0068	300	60	15	77.3	61.8
			Corncob	48.12	6.48	1.89	43.51	78.7089	3.28426	18.0068	400	60	15	36.9	180.1
			Corncob	48.12	6.48	1.89	43.51	78.7089	3.28426	18.0068	500	60	15	30.9	212.6
			Corncob	48.12	6.48	1.89	43.51	78.7089	3.28426	18.0068	600	60	15	21.7	192.9
			Corncob	42.1	5.9	0.5	NaN	91.16	2.3	6.54	300	60	20
			Corncob	42.1	5.9	0.5	NaN	91.16	2.3	6.54	350	60	20
			Corncob	42.1	5.9	0.5	NaN	91.16	2.3	6.54	400	60	20
			Corncob	42.1	5.9	0.5	NaN	91.16	2.3	6.54	450	60	20
			Corncob	44.47	5.82	0	48.88	87.76	1.05	11.19	400	60	5
			Corncob	44.47	5.82	0	48.88	87.76	1.05	11.19	450	60	5
			Corncob	44.47	5.82	0	48.88	87.76	1.05	11.19	500	60	5
			Corncob	44.47	5.82	0	48.88	87.76	1.05	11.19	550	60	5
			Corncob	44.47	5.82	0	48.88	87.76	1.05	11.19	600	60	5
[52]	Effect of the carbonization temperature on the properties of biochar produced from the pyrolysis of crop residues	10.15376/biores.13.2.3429-3446	Corn stover	41	7.17	0.99	33.24	78.4984	6.12025	15.3813	300	30	10	75.838
			Corn stover	41	7.17	0.99	33.24	78.4984	6.12025	15.38	400	30	10	51.2753
			Corn stover	41	7.17	0.99	33.24	78.4984	6.12025	15.3813	500	30	10	41.615
			Corn stover	41	7.17	0.99	33.24	78.4984	6.12025	15.3813	600	30	10	41.352
			Corn stover	41	7.17	0.99	33.24	78.4984	6.12025	15.3813	700	30	10	39.6514
			Wheat straw	37.83	10.18	1.31	36.74	75.6578	9.22552	15.1167	300	30	10	35.9871
			Wheat straw	37.83	10.18	1.31	36.74	75.6578	9.22552	15.1167	400	30	10	33.1294
			Wheat straw	37.83	10.18	1.31	36.74	75.6578	9.22552	15.1167	500	30	10	30.5346
			Wheat straw	37.83	10.18	1.31	36.74	75.6578	9.22552	15.1167	600	30	10	30.9028
			Wheat straw	37.83	10.18	1.31	36.74	75.6578	9.22552	15.1167	700	30	10	71.6478
			Rice Straw	38.62	6.1	1.6	32.88	71.9401	14.6303	13.4297	300	30	10	50.4688
			Rice Straw	38.62	6.1	1.6	32.88	71.9401	14.6303	13.4297	400	30	10	43.5786
			Rice Straw	38.62	6.1	1.6	32.88	71.9401	14.6303	13.4297	500	30	10	40.7208
			Rice Straw	38.62	6.1	1.6	32.88	71.9401	14.6303	13.4297	600	30	10	37.4248
			Rice Straw	38.62	6.1	1.6	32.88	71.9401	14.6303	13.4297	700	30	10	34.6547
			Rape stalk	39.7	7.63	1.13	38.8	76.2578	7.62685	16.1153	300	30	10	35.1806
			Rape stalk	39.7	7.63	1.13	38.8	76.2578	7.62685	16.1153	400	30	10	35.3559
			Rape stalk	39.7	7.63	1.13	38.8	76.2578	7.62685	16.1153	500	30	10	33.5852
			Rape stalk	39.7	7.63	1.13	38.8	76.2578	7.62685	16.1153	600	30	10	61.6369
			Rape stalk	39.7	7.63	1.13	38.8	76.2578	7.62685	16.1153	700	30	10	47.3305
			Cotton stalk	36.71	7.77	1.19	41.55	77.6667	4.37634	17.957	300	30	10	42.0708
			Cotton stalk	36.71	7.77	1.19	41.55	77.6667	4.37634	17.957	400	30	10	35.7241
			Cotton stalk	36.71	7.77	1.19	41.55	77.6667	4.37634	17.957	500	30	10	34.0235
			Cotton stalk	36.71	7.77	1.19	41.55	77.6667	4.37634	17.957	600	30	10	32.4982
			Cotton stalk	36.71	7.77	1.19	41.55	77.6667	4.37634	17.957	700	30	10	35.0053
			Cotton stalk	43.95	5.81	1.12	41.12	82.38	7.45	10.17	400	90	20	32.4105
			Cotton stalk	43.95	5.81	1.12	41.12	82.38	7.45	10.17	400	60	5	31.2534
			Cotton stalk	43.95	5.81	1.12	41.12	82.38	7.45	10.17	400	30	10	69.9472
			Cotton stalk	43.95	5.81	1.12	41.12	82.38	7.45	10.17	600	90	5	42.7721
			Cotton stalk	43.95	5.81	1.12	41.12	82.38	7.45	10.17	600	60	20	38.4942
			Cotton stalk	43.95	5.81	1.12	41.12	82.38	7.45	10.17	600	30	15	34.3741
			Cotton stalk	43.95	5.81	1.12	41.12	82.38	7.45	10.17	300	90	10	33.3047
			Cotton stalk	43.95	5.81	1.12	41.12	82.38	7.45	10.17	300	60	15	32.0599
			Cotton stalk	43.95	5.81	1.12	41.12	82.38	7.45	10.17	300	30	20	31.5164
			Cotton stalk	43.95	5.81	1.12	41.12	82.38	7.45	10.17	500	90	15	30.7099
			Cotton stalk	43.95	5.81	1.12	41.12	82.38	7.45	10.17	500	60	10	28.045
			Cotton stalk	43.95	5.81	1.12	41.12	82.38	7.45	10.17	500	30	5	42.0708
[53]	Pyrolysis/gasification of pine sawdust biomass briquettes under carbon dioxide atmosphere: study on carbon dioxide reduction (utilization) and biochar briquettes physicochemical properties	10.1016/j.biortech.2017.11.012	Pinewood sawdust	49.1	5.55	0.45	44.9	82.7486	0.529375	16.722	400	30	20		313.51
			Pinewood sawdust	49.1	5.55	0.45	44.9	82.7486	0.529375	16.722	500	30	20		337.67
			Pinewood sawdust	49.1	5.55	0.45	44.9	82.7486	0.529375	16.722	600	30	20		449.37
			Pinewood sawdust	49.1	5.55	0.45	44.9	82.7486	0.529375	16.722	700	30	20		465.27
			Pinewood sawdust	49.1	5.55	0.45	44.9	82.7486	0.529375	16.722	800	30	20		478.81
[54]	Effects of pyrolysis temperature on the physicochemical properties of gas and biochar obtained from pyrolysis of crop residues	10.1016/j.energy.2017.11.062	Corn stover	43.28	5.92	1.96	39.32	82.21	8.86	8.93	300	30	10	62.73
			Corn stover	43.28	5.92	1.96	39.32	82.21	8.86	8.93	350	30	10	46.6
			Corn stover	43.28	5.92	1.96	39.32	82.21	8.86	8.93	400	30	10	41.08
			Corn stover	43.28	5.92	1.96	39.32	82.21	8.86	8.93	450	30	10	37.79
			Corn stover	43.28	5.92	1.96	39.32	82.21	8.86	8.93	500	30	10	35.86
			Corn stover	43.28	5.92	1.96	39.32	82.21	8.86	8.93	550	30	10	35.02
			Corn stover	43.28	5.92	1.96	39.32	82.21	8.86	8.93	600	30	10	35.79
			Wheat straw	42.95	5.64	0.76	40.51	80.7	9.37	9.93	300	30	10	69.7
			Wheat straw	42.95	5.64	0.76	40.51	80.7	9.37	9.93	350	30	10	49.11
			Wheat straw	42.95	5.64	0.76	40.51	80.7	9.37	9.93	400	30	10	40.13
			Wheat straw	42.95	5.64	0.76	40.51	80.7	9.37	9.93	450	30	10	37.56
			Wheat straw	42.95	5.64	0.76	40.51	80.7	9.37	9.93	500	30	10	34.06
			Wheat straw	42.95	5.64	0.76	40.51	80.7	9.37	9.93	550	30	10	33.52
			Wheat straw	42.95	5.64	0.76	40.51	80.7	9.37	9.93	600	30	10	33.64
			Rice Straw	40.06	5.47	0.69	40.23	76.87	13.07	10.06	300	30	10	74.49
			Rice Straw	40.06	5.47	0.69	40.23	76.87	13.07	10.06	350	30	10	53.68
			Rice Straw	40.06	5.47	0.69	40.23	76.87	13.07	10.06	400	30	10	43.73
			Rice Straw	40.06	5.47	0.69	40.23	76.87	13.07	10.06	450	30	10	39.98
			Rice Straw	40.06	5.47	0.69	40.23	76.87	13.07	10.06	500	30	10	37.51
			Rice Straw	40.06	5.47	0.69	40.23	76.87	13.07	10.06	550	30	10	36.64
			Rice Straw	40.06	5.47	0.69	40.23	76.87	13.07	10.06	600	30	10	35.59
			Rape stalk	43.92	5.92	0.49	42.54	86.09	6.42	7.49	300	30	10	68.22
			Rape stalk	43.92	5.92	0.49	42.54	86.09	6.42	7.49	350	30	10	42.61
			Rape stalk	43.92	5.92	0.49	42.54	86.09	6.42	7.49	400	30	10	38.29
			Rape stalk	43.92	5.92	0.49	42.54	86.09	6.42	7.49	450	30	10	35.46
			Rape stalk	43.92	5.92	0.49	42.54	86.09	6.42	7.49	500	30	10	32.68
			Rape stalk	43.92	5.92	0.49	42.54	86.09	6.42	7.49	550	30	10	31.92
			Rape stalk	43.92	5.92	0.49	42.54	86.09	6.42	7.49	600	30	10	32.5
			Cotton stalk	43.95	5.81	1.12	41.12	82.38	7.45	10.17	300	30	10	72.85
			Cotton stalk	43.95	5.81	1.12	41.12	82.38	7.45	10.17	350	30	10	50.92
			Cotton stalk	43.95	5.81	1.12	41.12	82.38	7.45	10.17	400	30	10	41.72
			Cotton stalk	43.95	5.81	1.12	41.12	82.38	7.45	10.17	450	30	10	36.65
			Cotton stalk	43.95	5.81	1.12	41.12	82.38	7.45	10.17	500	30	10	34.98
			Cotton stalk	43.95	5.81	1.12	41.12	82.38	7.45	10.17	550	30	10	35.96
			Cotton stalk	43.95	5.81	1.12	41.12	82.38	7.45	10.17	600	30	10	35.67
[55]	Comparison of biochar properties from biomass residues produced by slow pyrolysis at 500 °C	10.1016/j.biortech.2013.08.135	Bagasse	51.71	5.32	0.33	42.64	80.226	2.37288	17.4011	500	60	10	24.5	202
			Cocopeat	61.57	4.37	1.02	33.04	70.2432	6.58083	23.176	500	60	10	38.7	13.7
			Palm kernel shell	55.82	5.62	0.84	37.73	75.8229	3.85925	20.3178	500	60	10	41	45.8
			Wood stem	50.52	5.81	0.23	43.44	87.8289	0.438596	11.7325	500	60	10	22.3	316
			Wood bark	53.42	6.12	1.4	39.06	76.5556	5.44444	18	500	60	10	31.9	13.6
[56]	Exhaustive study of products obtained from coconut shell pyrolysis	10.1016/j.jece.2016.02.024	Coconut shell	64.23	6.89	0.77	27.61	83.9822	3.55951	12.4583	450	1	20	34.2
			Coconut shell	64.23	6.89	0.77	27.61	83.9822	3.55951	12.4583	475	1	20	33.2
			Coconut shell	64.23	6.89	0.77	27.61	83.9822	3.55951	12.4583	500	1	20	28.5
			Coconut shell	64.23	6.89	0.77	27.61	83.9822	3.55951	12.4583	525	1	20	28.3
			Coconut shell	64.23	6.89	0.77	27.61	83.9822	3.55951	12.4583	550	1	20	26.4
			Coconut shell	64.23	6.89	0.77	27.61	83.9822	3.55951	12.4583	575	1	20	26.3
			Coconut shell	64.23	6.89	0.77	27.61	83.9822	3.55951	12.4583	600	1	20	25
[57]	Production of solid fuel biochar from waste biomass by low temperature pyrolysis	10.1016/j.fuel.2015.05.032	Coconut fiber	47.75	5.61	0.9	45.51	80.85	8.05	11.1	200	20	15	83.11
			Coconut fiber	47.75	5.61	0.9	45.51	80.85	8.05	11.1	225	20	15	80.13
			Coconut fiber	47.75	5.61	0.9	45.51	80.85	8.05	11.1	250	20	15	69.19
			Coconut fiber	47.75	5.61	0.9	45.51	80.85	8.05	11.1	275	20	15	63.87
			Coconut fiber	47.75	5.61	0.9	45.51	80.85	8.05	11.1	300	20	15	55.65
			Coconut fiber	47.75	5.61	0.9	45.51	80.85	8.05	11.1	330	20	15	50.12
			Pine wood	48.15	6.7	1.35	43.6	85.45	1.4	13.15	200	20	15	89.17
			Pine wood	48.15	6.7	1.35	43.6	85.45	1.4	13.15	225	20	15	79.19
			Pine wood	48.15	6.7	1.35	43.6	85.45	1.4	13.15	250	20	15	72
			Pine wood	48.15	6.7	1.35	43.6	85.45	1.4	13.15	275	20	15	65.16
			Pine wood	48.15	6.7	1.35	43.6	85.45	1.4	13.15	300	20	15	61.42
			Pine wood	48.15	6.7	1.35	43.6	85.45	1.4	13.15	330	20	15
[58]	Pyrolysis of agricultural biomass residues: Comparative study of corn cob, wheat straw, rice straw and rice husk	10.1016/j.biortech.2017.02.046	Wheat straw	38.34	5.47	0.6	NaN	83.08	6.63	10.29	300	60	20	36.1
			Wheat straw	38.34	5.47	0.6	NaN	83.08	6.63	10.29	350	60	20	34.6
			Wheat straw	38.34	5.47	0.6	NaN	83.08	6.63	10.29	400	60	20	34.4
			Wheat straw	38.34	5.47	0.6	NaN	83.08	6.63	10.29	450	60	20	32.4
			Rice husk	41.92	6.34	1.85	NaN	73.4173	15.1415	11.4411	300	60	20	43.3
			Rice husk	41.92	6.34	1.85	NaN	73.4173	15.1415	11.4411	350	60	20	37.2
			Rice husk	41.92	6.34	1.85	NaN	73.4173	15.1415	11.4411	400	60	20	35.9
			Rice husk	41.92	6.34	1.85	NaN	73.4173	15.1415	11.4411	450	60	20	35
			Rice Straw	36.07	5.2	0.64	NaN	78.07	15	6.93	300	60	20	35.1
			Rice Straw	36.07	5.2	0.64	NaN	78.07	15	6.93	350	60	20	35
			Rice Straw	36.07	5.2	0.64	NaN	78.07	15	6.93	400	60	20	33.5
			Rice Straw	36.07	5.2	0.64	NaN	78.07	15	6.93	450	60	20	33.1
[59]	Pyrolysis biochar systems, balance between bioenergy and carbon sequestration	10.1111/gcbb.12137	Wheat straw	41.4	5.6	0	53.1	78.4375	6.5625	15	350	20	5
			Wheat straw	41.4	5.6	0	53.1	78.4375	6.5625	15	450	20	5
			Wheat straw	41.4	5.6	0	53.1	78.4375	6.5625	15	550	20	5
			Wheat straw	41.4	5.6	0	53.1	78.4375	6.5625	15	650	20	5
[60]	Effects of temperature and particle size on the compositions, energy conversions and structural characteristics of pyrolysis products from different crop residues	10.1016/j.energy.2019.116413	Rice Straw	40.06	5.47	0.69	40.23	76.86	12.98	10.16	600	30	10		11.252
[61]	The effect of pyrolysis conditions on biochar stability as determined by three methods	10.1111/gcbb.12030	Pine	49.5	5.9	0	44.7	75.6198	2.06612	22.314	350	20	5	49.6
			Pine	49.5	5.9	0	44.7	75.6198	2.06612	22.314	450	20	5	38.7
			Pine	49.5	5.9	0	44.7	75.6198	2.06612	22.314	550	20	5	33.6
			Pine	49.5	5.9	0	44.7	75.6198	2.06612	22.314	650	20	5	30.2
[62]	Bamboo pyrolysis using TG–FTIR and a lab-scale reactor: Analysis of pyrolysis behavior, product properties, and carbon and energy yields	10.1016/j.fuel.2015.01.092	Bamboo	50.21	5.63	1.23	42.93	82.716	1.23457	16.0494	300	10	10	49.3	25.43
			Bamboo	50.21	5.63	1.23	42.93	82.716	1.23457	16.0494	400	10	10	30.7	26.12
			Bamboo	50.21	5.63	1.23	42.93	82.716	1.23457	16.0494	500	10	10	26	48.35
			Bamboo	50.21	5.63	1.23	42.93	82.716	1.23457	16.0494	600	10	10	24.3	60.93
			Bamboo	50.21	5.63	1.23	42.93	82.716	1.23457	16.0494	700	10	10	23.6	64.45
[63]	Comparison of the physicochemical characteristics of bio-char pyrolyzed from moso bamboo and rice husk with different pyrolysis temperatures	10.15376/biores.12.3.4652-4669	Bamboo	47.66	6.18	0.15	46.01	81.26	1.6	17.14	200	60	10		55.67
			Bamboo	47.66	6.18	0.15	46.01	81.26	1.6	17.14	300	60	10		35.55
			Bamboo	47.66	6.18	0.15	46.01	81.26	1.6	17.14	400	60	10		52.35
			Bamboo	47.66	6.18	0.15	46.01	81.26	1.6	17.14	500	60	10		57.09
			Bamboo	47.66	6.18	0.15	46.01	81.26	1.6	17.14	600	60	10		127.41
			Bamboo	47.66	6.18	0.15	46.01	81.26	1.6	17.14	700	60	10		188.51
			Bamboo	47.66	6.18	0.15	46.01	81.26	1.6	17.14	800	60	10		259.89
[64]	Pyrolysis of orange bagasse: Comparative study and parametric influence on the product yield and their characterization	10.1016/j.jece.2019.102903	Orange Bagasse	43.57	4.4	0.17	51.78	74.9387	2.83431	22.227	350	30	25
			Orange Bagasse	43.57	4.4	0.17	51.78	74.9387	2.83431	22.227	375	30	25
			Orange Bagasse	43.57	4.4	0.17	51.78	74.9387	2.83431	22.227	400	30	25
			Orange Bagasse	43.57	4.4	0.17	51.78	74.9387	2.83431	22.227	425	30	25
			Orange Bagasse	43.57	4.4	0.17	51.78	74.9387	2.83431	22.227	450	30	25
			Orange Bagasse	43.57	4.4	0.17	51.78	74.9387	2.83431	22.227	475	30	25
			Orange Bagasse	43.57	4.4	0.17	51.78	74.9387	2.83431	22.227	500	30	25
			Orange Bagasse	43.57	4.4	0.17	51.78	74.9387	2.83431	22.227	525	30	25
			Orange Bagasse	43.57	4.4	0.17	51.78	74.9387	2.83431	22.227	550	30	25
			Orange Bagasse	43.57	4.4	0.17	51.78	74.9387	2.83431	22.227	600	30	25
			Orange Bagasse	43.57	4.4	0.17	51.78	74.9387	2.83431	22.227	575	30	25
[65]	Effects of feedstock type and pyrolysis temperature on potential applications of biochar	10.1016/j.jaap.2016.05.006	Orange pomace	42.62	6.36	2.08	44.78	68.2	4	27.8	250	30	5	71
			Orange pomace	42.62	6.36	2.08	44.78	68.2	4	27.8	300	30	5	50
			Orange pomace	42.62	6.36	2.08	44.78	68.2	4	27.8	350	30	5	42.8
			Orange pomace	42.62	6.36	2.08	44.78	68.2	4	27.8	500	30	5	30
			Orange pomace	42.62	6.36	2.08	44.78	68.2	4	27.8	600	30	5	28.6
[66]	Characterization of products from the pyrolysis of rapeseed oil cake	10.1016/j.biortech.2008.04.040	Rapeseed oil cake	45.92	6.21	6.9	40.09	75.2824	7.04619	17.6714	400	30	5	38.4
			Rapeseed oil cake	45.92	6.21	6.9	40.09	75.2824	7.04619	17.6714	450	30	5	34.66
			Rapeseed oil cake	45.92	6.21	6.9	40.09	75.2824	7.04619	17.6714	500	30	5	33.23
			Rapeseed oil cake	45.92	6.21	6.9	40.09	75.2824	7.04619	17.6714	700	30	5	32.17
			Rapeseed oil cake	45.92	6.21	6.9	40.09	75.2824	7.04619	17.6714	900	30	5	30.04
[67]	A comparative study on biochar from slow pyrolysis of corn cob and cassava wastes	10.5281/zenodo.1127420	Cassava stem	44.47	5.82	0.01	48.88	81.51	2.42	16.07	400	60	5	36.2
			Cassava stem	44.47	5.82	0.01	48.88	81.51	2.42	16.07	450	60	5	30
			Cassava stem	44.47	5.82	0.01	48.88	81.51	2.42	16.07	500	60	5	27.84
			Cassava stem	44.47	5.82	0.01	48.88	81.51	2.42	16.07	550	60	5	26.7
			Cassava stem	44.47	5.82	0.01	48.88	81.51	2.42	16.07	600	60	5	25.4
			Cassava rhizome	41.78	5.97	0.26	51.07	83.64	7.28	9.08	400	60	5	36.67
			Cassava rhizome	41.78	5.97	0.26	51.07	83.64	7.28	9.08	450	60	5	32.5
			Cassava rhizome	41.78	5.97	0.26	51.07	83.64	7.28	9.08	500	60	5	32
			Cassava rhizome	41.78	5.97	0.26	51.07	83.64	7.28	9.08	550	60	5	32
			Cassava rhizome	41.78	5.97	0.26	51.07	83.64	7.28	9.08	600	60	5	30
[68]	Effects of temperature and particle size on the compositions, energy conversions and structural characteristics of pyrolysis products from different crop residues	10.1016/j.energy.2019.116413	Cotton stalk	43.95	5.81	1.12	41.12	82.63	7.39	9.98	300	30	10	75	2.1891
			Cotton stalk	43.95	5.81	1.12	41.12	82.63	7.39	9.98	350	30	10	47	5.82305
			Cotton stalk	43.95	5.81	1.12	41.12	82.63	7.39	9.98	400	30	10	45.2	6.8761
			Cotton stalk	43.95	5.81	1.12	41.12	82.63	7.39	9.98	450	30	10	42	2.3035
			Cotton stalk	43.95	5.81	1.12	41.12	82.63	7.39	9.98	500	30	10	37.85	6.6785
			Cotton stalk	43.95	5.81	1.12	41.12	82.63	7.39	9.98	550	30	10	36.92	11.6637
			Cotton stalk	43.95	5.81	1.12	41.12	82.63	7.39	9.98	600	30	10	36.56	6.57
[69]	Slow pyrolysis of agro-food wastes and physicochemical characterization of biofuel products	10.1016/j.chemosphere.2021.131431	Agro food waste	40.8	4.1	3.9	42	84.5564	9.85761	5.58598	300	30	5		0.85
			Agro-food waste	40.8	4.1	3.9	42	84.5564	9.85761	5.58598	400	30	5		2.18
			Agro-food waste	40.8	4.1	3.9	42	84.5564	9.85761	5.58598	500	30	5		2.87
			Agro-food waste	40.8	4.1	3.9	42	84.5564	9.85761	5.58598	600	30	5		4.35
			Agro-food waste	40.8	4.1	3.9	42	84.5564	9.85761	5.58598	600	40	5		4.91
			Agro-food waste	40.8	4.1	3.9	42	84.5564	9.85761	5.58598	600	50	5		4.91
			Agro-food waste	40.8	4.1	3.9	42	84.5564	9.85761	5.58598	600	60	5		4.91
			Agro-food waste	40.8	4.1	3.9	42	84.5564	9.85761	5.58598	600	60	10		4.91
			Agro-food waste	40.8	4.1	3.9	42	84.5564	9.85761	5.58598	600	60	15		4.91
			Agro-food waste	40.8	4.1	3.9	42	84.5564	9.85761	5.58598	600	60	20		4.91
			Canola hull	42.5	5.1	2.2	40.5	85.7143	9.95671	4.329	600	60	5		4.91
			Oat hull	43.2	5.5	0.2	45.7	87.0488	5.73248	7.21868	600	60	5		4.91
[70]	Pyrolysis biochar systems, balance between bioenergy and carbon sequestration	10.1111/gcbb.12137	Straw pallet	42	5.5	0.1	44.9	77.2773	7.40741	15.3153	350	10	5
			Straw pallet	42	5.5	0.1	44.9	77.2773	7.40741	15.3153	650	10	5
[71]	Effects of feedstock type and pyrolysis temperature on potential applications of biochar	10.1016/j.jaap.2016.05.006	Vine pruning	40.86	5.27	1.03	48.07	70.9	4.3	24.8	250	30	5	72.6	8.1
			Vine pruning	40.86	5.27	1.03	48.07	70.9	4.3	24.8	300	30	5	67.8	8.1
			Vine pruning	40.86	5.27	1.03	48.07	70.9	4.3	24.8	350	30	5	43.75	8.1
			Vine pruning	40.86	5.27	1.03	48.07	70.9	4.3	24.8	500	30	5	33.66	8.1
			Vine pruning	40.86	5.27	1.03	48.07	70.9	4.3	24.8	600	30	5	30.52	8.1
			Poultry litter	35.7	5.27	9.61	40.98	68.3	8.2	23.5	250	30	5	68.56	2
			Poultry litter	35.7	5.27	9.61	40.98	68.3	8.2	23.5	300	30	5	57.88	2
			Poultry litter	35.7	5.27	9.61	40.98	68.3	8.2	23.5	350	30	5	45.9	3.1
			Poultry litter	35.7	5.27	9.61	40.98	68.3	8.2	23.5	500	30	5	34.02	3.1
			Poultry litter	35.7	5.27	9.61	40.98	68.3	8.2	23.5	600	30	5	31.12	3.1
			hinoki cypress	51.88	6.21	0.16	41.76	84.75	0.16	15.09	350	60	10	45.95	1.2
			hinoki cypress	51.88	6.21	0.16	41.76	84.75	0.16	15.09	400	60	10	40.56	1.2
			hinoki cypress	51.88	6.21	0.16	41.76	84.75	0.16	15.09	500	60	10	32.55	1.2
			hinoki cypress	51.88	6.21	0.16	41.76	84.75	0.16	15.09	600	60	10	29.95	1.2
